# Supplementary material for: Adaptation and convergence in circadian‐related genes in Iberian freshwater fish
Source: BMC Ecol Evol. 2021 Mar 8;21:38. doi: 10.1186/s12862-021-01767-z (PMC7941933; doi:10.1186/s12862-021-01767-z)
Supplement: Supplementary file 6 — Additional file 6: Table S5. Summary of sites detected to be under positive selection using MEME and FUBAR methods, and corresponding changes in amino acid and predicted impacts. [file 12862_2021_1767_MOESM6_ESM.xlsx]

## Sheet: Table S5
Table S5: Summary of sites detected to be under positive selection using MEME and FUBAR methods, and corresponding changes in amino acid and predicted impacts. A threshold of 0.1 was used for statistical significance for MEME (p-value<0.1) and a posterior probability larger than 0.9 for FUBAR.
Protein	#sites under positive selection (MEME/FUBAR)	Site	p-value (MEME)	Bayes Factor (FUBAR)	Type of non-synonymous mutation	Speciesa	Most probable impacted physicochemical parameter	Domain	Amino acid in each species and in outgroupb
									Dr	Sc	SpT	SpG	St	Sa
CRY1AA	1/0	K275Q	0.03	4.429	Non-conservative	S. torgalensis	Isoelectric point (pI)	-	K	K	K	K	Q	K
CRY1AB	0/0	-	-	-	-	-	-	-	-	-	-	-	-	-
CRY1BA	0/0	-	-	-	-	-	-	-	-	-	-	-	-	-
CRY1BB	0/0	-	-	-	-	-	-	-	-	-	-	-	-	-
CRY2	1/0	I274V	0	4.426	Conservative	S. aradensis / S. torgalensis	None	-	M	I	I	I	V	V
CRY3	1/13	V40A	-	17.462	Conservative	S. carolitertii / S. pyrenaicus (Tagus) / S. pyrenaicus (Almargem)	None	DNA Photolyase	V	A	A	A	V	V
		H47P	-	20.455	Non-conservative	S. carolitertii / S. pyrenaicus (Tagus) / S. pyrenaicus (Almargem)	pI	DNA Photolyase	H	P	P	P	H	H
		L60M	-	14.3	Non-conservative	S. aradensis / S. torgalensis	Aliphatic index	DNA Photolyase	L	L	L	L	M	M
		T65A	-	16.773	Non-conservative	S. carolitertii / S. pyrenaicus (Tagus) / S. pyrenaicus (Almargem)	Aliphatic index	DNA Photolyase	T	A	A	A	T	T
		Q96H	0.02	10.315	Non-conservative	S. aradensis / S. torgalensis	pI	DNA Photolyase	Q	Q	Q	Q	H	H
		E186V	-	14.755	Non-conservative	S. torgalensis/S. pyrenaicus (Almargem)	pI; Aliphatic Index	-	D	E	E	V	V	E
		T245M	-	12.204	Non-conservative	S. torgalensis/S. pyrenaicus (Almargem)	None*	-	T	T	T	M	M	T
		C256Y	-	19.19	Non-conservative	S. torgalensis/S. pyrenaicus (Almargem)	None*	-	C	C	C	Y	Y	C
		Q286L	-	19.715	Non-conservative	S. torgalensis/S. pyrenaicus (Almargem)	Aliphatic index	FAD Binding	Q	Q	Q	L	L	Q
		R290P	-	22.837	Non-conservative	S. torgalensis/S. pyrenaicus (Almargem)	pI	FAD Binding	R	R	R	P	P	R
		E514G	-	13.591	Non-conservative	S. aradensis / S. torgalensis	pI; Aliphatic Index	-	E	E	E	E	G	G
		R529H	-	25.379	Conservative	S. aradensis / S. torgalensis	None	-	R	R	R	R	H	H
		S542G	-	16.083	Non-conservative	S. carolitertii / S. pyrenaicus (Tagus) / S. pyrenaicus (Almargem)	Aliphatic index	-	S	G	G	G	S	S
		H553R	-	13.854	Conservative	S. aradensis / S. torgalensis	None	-	L	H	H	H	R	R
PER1A	1/5	T17F	-	18.54	Non-conservative	S. aradensis / S. torgalensis	None*	-	S	T	T	T	F	F
		L189V/H	-	19.212	Conservative (V) / Non-conservative (H)	S. pyrenaicus (Almargem)	None (V) / pI; Aliphatic indez (H)	PAS	L	L	L	H	V	V
		T254A	0.08	5.319	Non-conservative	S. carolitertii	Aliphatic index	PAS	S	A	T	T	T	T
		K1041T/N	-	16.529	Non-conservative	S. aradensis (N) / S. pyrenaicus (Almargem, T)	pI	C-terminal	R	K	K	T	K	N
		E1208V	-	18.953	Non-conservative	S. torgalensis/S. pyrenaicus (Almargem)	pI; Aliphatic Index	-	T	E	E	V	V	E
		S1230N	-	13.298	Non-conservative	S. aradensis/S. pyrenaicus (Almargem)	None*	-	T	S	S	N	S	N
PER1B	1/1	T1256V	0.08	23.652	Non-conservative	S. torgalensis	Aliphatic index	C-terminal	S	T	T	T	V	T
PER2	4/13	T86I	-	12.903	Non-conservative	S. aradensis / S. torgalensis	Aliphatic index	-	T	T	T	T	I	I
		G110A	-	15.396	Conservative	S. aradensis / S. torgalensis	None	-	G	G	G	G	A	A
		S137L	-	22.536	Non-conservative	S. aradensis / S. torgalensis	Aliphatic index	-	S	S	S	S	L	L
		Y206D	-	15.279	Non-conservative	S. aradensis / S. torgalensis	pI	-	Y	Y	Y	Y	D	D
		R339S	-	13.366	Non-conservative	S. aradensis / S. torgalensis	pI	-	R	R	R	R	S	S
		L377I/R	-	13.768	Conservative (I) / Non-conservative (R)	S. pyrenaicus (Tejo, R) / S. aradensis (I) / S. pyrenaicus (Almargem, I)	None (I) / pI; Aliphatic index (R)	-	L	L	R	I	L	I
		T402D	0.01	12.69	Non-conservative	S. aradensis / S. pyrenaicus (Almargem)	pI	PAS	T	T	T	D	T	D
		T443A	-	14.994	Non-conservative	S. carolitertii / S. pyrenaicus (Tagus) / S. pyrenaicus (Almargem)	None*	PAS	T	A	A	A	T	T
		S480C	-	15.451	Non-conservative	S. aradensis / S. torgalensis	None*	-	S	S	S	S	C	C
		T514L	0.02	9.166	Non-conservative	S. aradensis	Aliphatic index	-	T	T	T	T	T	L
		A624E/G	-	13.872	Non-conservative (E) / Conservative (G)	S. aradensis (E) / S. pyrenaicus (Almargem, G)	pI; Aliphatic Index (E); None (G)	-	A	A	A	G	A	E
		R697A	0.03	7.826	Non-conservative	S. torgalensis	pI; Aliphatic index	-	R	R	R	R	A	R
		G1208T	0.09	14.78	Non-conservative	S. torgalensis	None	C-terminal	G	G	G	G	T	G
		E1319Q/K	-	12.282	Non-conservative	S. pyrenaicus (Tagus, Q) / S. carolitertii (K)	pI	C-terminal	D	K	Q	E	E	E
		L1383V/I	-	21.739	Conservative	S. pyrenaicus (Almargem)	None	-	L	L	L	I	V	V
PER3	1/6	Y187S	-	14.832	Non-conservative	S. pyrenaicus (Almargem)	None*	-	Y	Y	Y	S	Y	Y
		K429Y	0.02	18.362	Non-conservative	S. carolitertii / S. pyrenaicus (Tagus)	pI	PAS	K	Y	Y	K	K	K
		T606N	-	16.027	Non-conservative	S. pyrenaicus (Tagus) / S. pyrenaicus (Almargem)	None*	-	S	T	N	N	T	T
		S760R	-	14.9	Non-conservative	S. aradensis/ S. pyrenaicus (Almargem)	pI	-	S	S	S	R	S	R
		G914S	-	17.718	Non-conservative	S. pyrenaicus (Tagus) / S. pyrenaicus (Almargem)	Aliphatic index	-	G	G	S	S	G	G
		T935I	-	19.689	Non-conservative	S. pyrenaicus (Tagus) / S. pyrenaicus (Almargem)	Aliphatic index	-	T	T	I	I	T	T
CLOCKA	0/2	L490R	-	23.152	Non-conservative	S. aradensis / S. torgalensis	pI; Aliphatic index	-	L	L	L	L	R	R
		Q501H	-	16.491	Non-conservative	S. aradensis / S. torgalensis	pI	-	Q	Q	Q	Q	H	H
CLOCKB	0/3	F508R	-	16.028	Non-conservative	S. aradensis / S. torgalensis / S. pyrenaicus (Almargem)	pI	-	F	F	F	R	R	R
		N513L		14.41	Non-conservative	S. aradensis / S. torgalensis / S. pyrenaicus (Almargem)	Aliphatic index	-	N	N	N	L	L	L
		Q516C		13.412	Non-conservative	S. aradensis / S. torgalensis / S. pyrenaicus (Almargem)	None*	-	Q	Q	Q	C	C	C
CLOCK2	0/1	V106D	-	18.653	Non-conservative	S. aradensis / S. pyrenaicus (Almargem) / S. pyrenaicus (Tejo)	pI; Aliphatic index	-	V	V	D	D	V	D
BMAL1A	0/0	-	-	-	-	-	-	-	-	-	-	-	-	-
BMAL1B	0/0	-	-	-	-	-	-	-	-	-	-	-	-	-
BMAL2	1/4	R20P	0.09	4.352	Non-conservative	S. torgalensis	pI	-	G	R	R	R	P	R
		A285I	-	17.163	Conservative	S. carolitertii / S. pyrenaicus (Tagus) / S. pyrenaicus (Almargem)	None	-	A	I	I	I	A	A
		S286V	-	27.731	Non-conservative	S. carolitertii / S. pyrenaicus (Tagus) / S. pyrenaicus (Almargem)	Aliphatic index	-	S	V	V	V	S	S
		K288V	-	13.458	Non-conservative	S. carolitertii / S. pyrenaicus (Tagus) / S. pyrenaicus (Almargem)	pI;Aliphatic index	-	K	V	V	V	K	K
		E620H/Q	-	11.549	Non-conservative	S. pyrenaicus (Almargem, H)/ S. pyrenaicus (Tejo) and S. carolitertii (Q)	pI	-	E	Q	Q	H	E	E
aThe species/populations with the amino acid change was determined by comparing with the amino acid in the outgroup Danio rerio sequence. When the outgroup was different, the most common among Squalius were considered the ancestral state.
*Non-conservative mutation without impact on studied parameters
bSpecies abbreviations:
Dr: Danio rerio (outgroup)
Sc: Squalius carolitertii
SpT: Squalius pyrenaicus (Tagus)
SpG: Squalius pyrenaicus (Almargem)
St: Squalius torgalensis
Sa: Squalius aradensis
